# Supplementary material
Source: PubMed Central journal article supplement (PMC4343088)

## **Supplementary Information**

### **Differential RNA-seq of *Vibrio cholerae* identifies the VqmR sRNA as a regulator of biofilm formation**

Kai Papenfort, Konrad U. Förstner, Jian-Ping Cong, Cynthia M. Sharma and Bonnie L. Bassler

#### **This supplement contains:**

Figures S1 to S8

Tables S1 to S5

Datasets S1 to S4

Supplementary Figure Legends

Supplementary Materials and Methods

Supplemental References

## TABLE OF CONTENTS

- Figure S1** Accuracy of TSS predictions.
- Figure S2** Intergenic and 5' UTR-derived sRNAs from *V. cholerae*
- Figure S3** 3' UTR-derived and *cis*-encoded sRNAs from *V. cholerae*.
- Figure S4** Annotation of the VqmA protein and its translation start site.
- Figure S5** Stability, VqmA EMSA control, and conservation of *vqmR*.
- Figure S6** Secondary structure of VqmR.
- Figure S7** Target gene regulation by VqmR.
- Figure S8** Gene synteny analysis of *vqmR* and *vqmA* / VqmR copy number.

## Supplementary Materials and Methods

- Table S1** Microarray analysis following VqmR pulse expression.
- Table S2** Bacterial strains used in this study.
- Table S3** Plasmids used in this study.
- Table S4** DNA oligonucleotides used in this study.
- Table S5** Mapping statistics for *V. cholerae* dRNA-seq.
- Dataset S1** Gene expression profiles in wild-type and *luxO* D47E *V. cholerae*.
- Dataset S2** Detection of TSS in wild-type and *luxO* D47E *V. cholerae*.
- Dataset S3** RNA-seq based re-annotation of *V. cholerae* ORFs.
- Dataset S4** Compilation of known and predicted sRNA candidates in *V. cholerae*.

## Supplementary Figure Legends

**Figure S1: Accuracy of TSS predictions.** Histogram indicating distances between 35 representative TSS identified by dRNA-seq vs. annotated TSS. 94% matched within  $\pm 1$  nt tolerance.

**Figure S2: Intergenic and 5' UTR-derived sRNAs.** Total RNA was obtained following growth for the indicated times from wild-type, *luxO* D47E, and  $\Delta hfq$  *V. cholerae* strains and probed for the designated sRNAs by Northern Blot. The genomic locations of the sRNAs are shown above the gels. Genes are shown in black, sRNAs are shown in red. Arrows indicate TSS. Filled triangles indicate TSS, open triangles indicate processing sites. 5S rRNA served as the loading control. **(A)** sRNAs from intergenic regions **(B)** sRNAs from 5' UTRs of mRNAs.

**Figure S3: 3' UTR-derived and cis-encoded sRNAs.** Total RNA was obtained following growth for the indicated times from wild-type, *luxO* D47E, and  $\Delta hfq$  *V. cholerae* strains and probed for the designated sRNAs by Northern Blot. The genomic locations of the sRNAs are shown above the gels. Genes are shown in black, sRNAs are shown in red. Arrows and scissors indicate TSS and processing sites, respectively. Filled triangles indicate TSS, open triangles indicate processing sites. 5S rRNA served as the loading control. **(A)** sRNAs from 3' UTRs of mRNAs **(B)** cis-encoded sRNAs. VqmR (Vcr107) is transcribed separately from the *vca1078* mRNA (see main text). The genomic locations of the sRNAs are shown above the gels.

**Figure S4: Annotation of the VqmA protein and its start site.** **(A)** Alignment of VqmA (Vca1078) protein sequences from eleven vibrio species. The first amino acid is boxed. When the residue is valine (V) the start codon is a GTG. **(B)** Left: schematic drawing of the *vca1078::gfp* translational reporter construct. The relative positions of the annotated ATG start codon and the predicted alternative GTG start codon are indicated. Arrows indicate TSS identified by dRNA-seq (see Figure 3A). Right: Western Blot analysis of Vca1078::GFP. Mutation of the annotated start codon is designated ATG-ATC, mutation of the conserved start codon is designated GTG-GTC, ctr designates the control plasmid. RNAP $\alpha$  served as loading control.

**Figure S5: Stability, copy number, and conservation of *vqmR*.** **(A)** Left: *V. cholerae* wild-type and  $\Delta hfq$  strains were grown to OD<sub>600</sub> of 1.0 and treated with rifampicin (250  $\mu$ g/ml) to terminate transcription. Total RNA was collected at the indicated time-points followed by Northern Blotting and analysis of VqmR. 5S rRNA served as loading control. Right: Quantification of data obtained from three independent biological replicates performed for (A). Diamonds; wild-type, squares;  $\Delta hfq$  strain. The dashed line indicates the sRNA half-life (50% of the initial abundance). **(B)**

Alignment of *vqmR* sequences from eight vibrio species. Nomenclature is according to Figure 3B with the addition of *Vibrio proteolyticus* (Vpr). The highly conserved R1 and R2 regions are boxed and marked. **C)** Electrophoretic mobility shift assay (EMSA) showing that VqmA protein does not bind a mutated variant of the *vqmR* promoter sequence. The mutated sequence is indicated in Figure 4C (-47 to -49 relative to TSS). Migration of the [P32] end-labeled DNA fragments in the absence and presence of different concentrations of purified VqmA::3XFLAG protein was determined by native polyacrylamide gel electrophoresis and autoradiography.

**Figure S6: Secondary structure of VqmR.** Left: Enzymatic probing of the VqmR secondary structure. *In vitro* synthesized and radio-labeled VqmR was treated with RNase T1, RNase V1, and RNase A, designated T1, V1, and A, respectively. C indicates the untreated control, A and T1 indicate RNase ladders for VqmR treated with RNase A and RNase T1, respectively, under denaturing conditions, OH indicates the alkaline ladder. Conserved regions R1 and R2 are marked in red. Right: Schematic representation of the VqmR secondary structure. Conserved regions R1 and R2 are marked in red. Cleavage by RNase T1 (red), RNase V1 (green), and RNase A (blue) is indicated by arrows.

**Figure S7: Target gene regulation by VqmR.** **(A)** Translational GFP-fusions to the VqmR-controlled target genes depicted on the x-axis were tested for repression by VqmR in an *E. coli*  $\Delta hfq$  strain. GFP levels were determined in triplicate using a plate reader. Gray bars show GFP production in the presence of the control plasmid (pctr), black bars show GFP production when VqmR is expressed from the plasmid (pVqmR). **(B)** Northern Blot analysis of VqmR, VqmR $\Delta$ R1, and VqmR $\Delta$ R2. *E. coli* cells carrying the indicated plasmids were grown to OD<sub>600</sub>=1.0 and assessed for VqmR levels. **(C)** Predicted base-pairing interaction of VqmR with target mRNAs using RNA hybrid (1). Conserved sequences of VqmR are shown in red. The Shine-Dalgarno sequences and start codons of the mRNAs are boxed. The proposed strength of interaction is indicated below each RNA duplex.

**Figure S8: Gene synteny analysis of *vqmR* and *vqmA*.** The sequences upstream of *vqmA* genes from vibrios were examined for the presence of *vqmR*. *vqmA* is shown in red and *vqmR* is shown in black. The genes upstream of *vqmR* are shown in gray, and their conservation and orientation vary among vibrios. Nomenclature as in Figure 3B. **(B)** Copy number of VqmR. Total RNA from wild-type *V. cholerae* was collected at the time points indicated followed by Northern Blot. The amounts of RNA were compared to serial dilutions of *in vitro* transcribed VqmR (lanes 4-8). Copy numbers per cell are indicated below the blot. 5S rRNA served as loading control.

## Supplementary Materials and Methods

### Plasmid construction

A complete list of all plasmids used in this study is in Table S7. Plasmid pKP-331 was constructed by amplification of the *V. cholerae* *vqmR* gene using oligonucleotides KPO-0456/0457 and ligation into pLF575 (2). Plasmid pKP-333 was made by PCR amplification of the *vqmR* gene using oligonucleotides KPO-0456/0465 followed by ligation into pEVS143 (3). This plasmid served as the template for plasmids pKP-410, pKP-442, pKP344 and pKP-345 using oligonucleotides KPO-0750/0751, KPO-0949/0950, KPO-0493/0494 and KPO-0491/0492, respectively. Cloning of GFP fusions (pKP-337, pKP-338, pKP-444, pKP-346, pKP-347, pKP-353, pKP-354, pKP-358) to target genes has been described previously (4) and oligonucleotides for cloning are listed in Table S8. Plasmids pKP-337 and pKP-347 were used to obtain plasmids pKP-398 and pKP-441 using oligonucleotides KPO-0725/0726 and KPO-0947/0948, respectively. For the GFP-based transcriptional reporter plasmids pKP-361 and pKP386, promoter sequences of *vqmR* and *vpsL* were amplified with oligonucleotides KPO-0460/0461 and KPO-0671/0696 and cloned into pCMW-1. The translational reporter *PvqmA::GFP* (pKP-357) was constructed by amplification of the *vqmR-vqmA* sequence using oligonucleotides KPO460/467 and the product ligated into pEVS143 amplified with oligonucleotides KPO-0092/0285. This plasmid pKP-357 served as th template to obtain plasmids pKP-359 and pKP-366 using oligonucleotides KPO-0468/0469 and KPO-0470/0471, respectively. For plasmid pKP-418, the *vqmA* sequence was amplified with oligonucleotides KPO-0475/0547 and cloned into pEVS143-CAM. Plasmid pKP-367 was constructed by amplifying the *vqmA* sequence using oligonucleotides KPO-0545/0546, and the product was cloned into pKP8-35 (5). Plasmid pKP-437 was constructed by PCR amplification of the *vqmA::3XFLAG* gene (oligonucleotides KPO-0934/0935) from strain KPS-0518 and cloning into pET15b (Novagen) via restriction sites NcoI and BamHI.

### Construction of *V. cholerae* mutant strains

A list of all strains used in this study is provided in Table S6. *V. cholerae* C6706 was the wild-type strain used throughout this study. All *V. cholerae* mutants were generated using the pKAS32 suicide vector (6) and established cloning strategies (7). To generate strain KPS-0429, the flanking regions of *vqmR* were amplified with KPO-0495/0496 and KPO-0497/0498 and the fused PCR product was amplified using KPO-0499/0500. The PCR products were ligated into pKAS32 using AvrII/KpnI restriction sites. The plasmid was conjugated into *V. cholerae* and cells were selected for Ampicillin resistance. Single colonies were transferred to new plates selecting for Streptomycin resistance. Finally, cells were tested for the correct muatation usinfg PCR. The

same strategy was used to construct KPS-0431 (oligonucleotides: KPO-0495/0502, KPO-0503/0504, KPO-0499/0505). For strain KPS-0518, the 3XFLAG epitope was introduced downstream of *vpsT* by PCR amplification using oligonucleotides KPO-0527/0528 and KPO-0524/0529. Oligonucleotides KPO-0526 and KPO-0531 were used to amplify the fused PCR product, which was subsequently cloned into pKAS32. A similar strategy was used to make strain KPS-0647 except the *vqmR* promoter was fused upstream of *lacZ* to generate the transcriptional reporter.

### RNA structure probing

Secondary structure probing of *in vitro* synthesized and 5' end-labeled RNA was conducted as described previously (8). In brief, VqmR RNA (~0.2 pmol) was denatured, chilled on ice and incubated in 1X structure buffer (Ambion) and 1 µg yeast RNA at 37°C for 10 min. Subsequently, samples were treated with RNase T1, RNase A or RNase V1 (all Ambion) and reactions were terminated at indicated time-points by addition of 2 vol. of precipitation buffer (Ambion). Precipitated samples were washed with 70% ethanol, and resuspended in loading buffer (Ambion). To prepare RNase T1 sequencing ladders, 0.4 pmol RNA was denatured (95°C, 2 min) in 1X sequencing buffer (Ambion) and chilled on ice. RNase T1 was added, and RNA was digested for 5 min at 37°C. Alkaline (OH) sequencing ladders were prepared by incubating 0.4 pmol RNA at 95°C for 5 min in the presence of alkaline hydrolysis buffer (Ambion). Reactions were stopped by addition of 1 vol. of loading buffer. Samples were denatured prior to loading (95°C, 2 min) and separated on 8% PAA/7M urea sequencing gels. Gels were dried and signals were analysed on a Typhoon phosphorimager.

### Library construction and sequencing

Libraries for Illumina sequencing (HiSeq) of cDNA were constructed by vertis Biotechnology AG, Germany (<http://www.vertis-biotech.com/>), as described previously for eukaryotic microRNAs (9), except that the RNA size-fractionation step prior to cDNA synthesis was omitted. Total RNA samples were used for the preparation of two libraries each, either covering all transcripts or being specifically enriched for primary transcripts by treatment with terminator exonuclease (TEX, Epicentre). Next, RNA was treated with Poly(A) polymerase to add poly-A-tails and 5'-triphosphates were removed using tobacco acid pyrophosphatase (TAP). This step resulted in 5'-monophosphates at the ends of transcripts. Subsequently, an RNA adapter was ligated to the 5'-phosphate. First-strand cDNA was synthesized using an oligo(dT)-adapter primer, and M-MLV reverse transcriptase. A PCR-based amplification step was performed to increase the cDNA

concentration to ~20-30 ng/μl. A library-specific barcode for multiplex sequencing was incorporated into the 3'-sequencing adapters. The following adapter sequences flanked the cDNA inserts:

TrueSeq Sense primer

5'-AATGATACGGCGACCACCGAGATCTACACTCTTTCCCTACACGACGCTCTTCCGATCT-3'

TrueSeq Antisense NNNNNN primer (NNNNNN = 6n barcode for multiplexing)

5'-CAAGCAGAAGACGGCATACGAGAT-NNNNNN-GTGACTGGAGTTCAGACGTGTGCTCTTCCGATC(dT25)-3'

The resulting cDNA libraries were sequenced using a HiSeq 2500 instrument (Illumina) in single-read mode for 100 cycles. The raw, de-multiplexed reads as well as the normalized coverage files have been deposited in the National Center for Biotechnology Information's Gene Expression Omnibus (GEO) (10) and are accessible via the GEO accession number GSE62084.

Read mapping and coverage plot construction

Detailed information on data analyses are available at: <https://zenodo.org/record/13136>. To assure a high sequence quality, the Illumina reads in FASTQ format were trimmed with a cut-off phred score of 20 using the program `fastq_quality_trimmer` from FASTX toolkit version 0.10.1 ([http://hannonlab.cshl.edu/fastx\\_toolkit/](http://hannonlab.cshl.edu/fastx_toolkit/)). The following steps were performed using subcommand "create", "align" and "coverage" in the tool READemption (11) version 0.3.0: The poly(A)-tail sequences were computationally removed, and a size filtering step was applied in which sequences shorter than 12 nt were eliminated. The remaining reads were mapped to the reference genome sequence using `segemehl` version 0.1.7 (12). As reference sequence, two replicons from *V. cholerae* with the accession numbers NC\_002505.1 and NC\_002506.1 were downloaded from the NCBI ftp server [ftp://ftp.ncbi.nih.gov/genbank/genomes/Bacteria/Vibrio\\_cholerae\\_O1\\_biovar\\_EI\\_Tor\\_N16961\\_uid57623](ftp://ftp.ncbi.nih.gov/genbank/genomes/Bacteria/Vibrio_cholerae_O1_biovar_EI_Tor_N16961_uid57623). As there was a small fraction of fungal contamination in the sample, the following additional replicons NC\_001133.9, NC\_001134.8, NC\_001135.5, NC\_001136.10, NC\_001137.3, NC\_001138.5, NC\_001139.9, NC\_001140.6, NC\_001141.2, NC\_001142.9, NC\_001143.9, NC\_001144.5, NC\_001145.3, NC\_001146.8, NC\_001147.6, NC\_001148.4, NC\_001224.1 were downloaded from [ftp://ftp.ncbi.nih.gov/genomes/Fungi/Saccharomyces\\_cerevisiae\\_uid128/](ftp://ftp.ncbi.nih.gov/genomes/Fungi/Saccharomyces_cerevisiae_uid128/).

READemption's subcommand align was called with the following parameters:

```
--split -r -p 24 -a 95 -l 12 --poly_a_clipping --progress -x
```

```
"Vibrio:NC_002505.1,NC_002506.1;Fungus:NC_001133.9,NC_001134.8,NC_001135.5,NC_001136.10,NC_001137.3,NC_001138.5,NC_001139.9,NC_001140.6,NC_001141.2,NC_001142.9,N
```

C\_001143.9,NC\_001144.5,NC\_001145.3,NC\_001146.8,NC\_001147.6,NC\_001148.4,NC\_001224.1".

Mapping statistics (input, aligned, uniquely aligned reads, etc.) can be found in Table S9. Coverage plots in wiggle format that represent the number of aligned reads per nucleotide were generated. The data were visualized using the Integrated Genome Viewer (13). Each graph was normalized using the total number of reads that could be aligned from the corresponding library. To restore the original data range and to prevent rounding of small errors to zero by genome browsers, each graph was subsequently multiplied by the minimum number of mapped reads calculated over all libraries.

#### Transcription start site prediction

Transcription start sites were predicted based on the normalized wiggle files using TSSpredator (14) with the "more strict" parameter setting.

#### Meme analysis

Sequences of the TSS and the 50 nts upstream were extracted from the TSSpredator output master table. MEME version 4.9.1 (15) was used to detect motifs of lengths of 45 nt.

#### Differential gene expression analysis

The predicted TSS were used to extend the gene annotations of the existing *V. cholerae* genome database. Gene expression quantification and expression comparisons were performed based on these extended annotations using the non-TEX treated libraries and READemption in combination with DESeq2 version 1.4.5 (11). Genes changing >1.5-fold (p-value < 0.05) were defined as differentially expressed.



**Table S1:** Microarray following VqmR pulse expression

| Gene <sup>a</sup> | Fold-change <sup>b</sup> | Annotation                                                    |
|-------------------|--------------------------|---------------------------------------------------------------|
| <i>vc0200</i>     | -2.8                     | iron(III) compound receptor                                   |
| <i>vc0201</i>     | -2.2                     | iron(III) ABC transporter, ATP-binding protein                |
| <i>vc1063</i>     | -3.2                     | tesB;acyl-CoA thioesterase II                                 |
| <i>vc1186</i>     | +2.2                     | sanA protein                                                  |
| <i>vc1187</i>     | +2.4                     | hypothetical protein                                          |
| <i>vc1188</i>     | +3.0                     | sfcA;malate dehydrogenase                                     |
| <i>vc1449</i>     | -2.2                     | hypothetical protein                                          |
| <i>vc1450</i>     | -2.4                     | rtxC;RTX toxin activating protein                             |
| <i>vc1865</i>     | -2.5                     | hypothetical protein                                          |
| <i>vca0068</i>    | -17.2                    | methyl-accepting chemotaxis protein                           |
| <i>vca0590</i>    | -2.4                     | peptide ABC transporter, permease protein                     |
| <i>vca0591</i>    | -2.2                     | peptide ABC transporter, periplasmic peptide-binding protein  |
| <i>vca0676</i>    | -3.6                     | ferredoxin-type protein NapF                                  |
| <i>vca0677</i>    | -4.2                     | napD protein                                                  |
| <i>vca0679</i>    | -5.9                     | napB;periplasmic nitrate reductase, cytochrome c-type protein |
| <i>vca0917</i>    | -2.3                     | transcriptional regulator, TetR family                        |
| <i>vca0952</i>    | -2.8                     | transcriptional regulator, LuxR family (VpsT)                 |

a. according to *V. cholerae* N16961 gene annotation

b. Fold-change as obtained by transcriptome analysis using *V. cholerae* specific whole genome microarrays.

**Table S2:** Bacterial strains used in this study

| Strain                    | Relevant markers/ genotype                                                                                                                                                                                                              | Reference/ source         |
|---------------------------|-----------------------------------------------------------------------------------------------------------------------------------------------------------------------------------------------------------------------------------------|---------------------------|
| <b><i>V. cholerae</i></b> |                                                                                                                                                                                                                                         |                           |
| KPS-0014                  | Wild-type C6706                                                                                                                                                                                                                         | (16)                      |
| KPS-0023                  | <i>luxO</i> D47E C6706                                                                                                                                                                                                                  | (17)                      |
| KPS-0053                  | $\Delta$ <i>hapR</i> C6706                                                                                                                                                                                                              | (17)                      |
| KPS-0054                  | $\Delta$ <i>hfq</i> C6706                                                                                                                                                                                                               | (17)                      |
| KPS-0429                  | $\Delta$ <i>vqmR</i> C6706                                                                                                                                                                                                              | This study                |
| KPS-0431                  | $\Delta$ <i>vqmA</i> C6706                                                                                                                                                                                                              | This study                |
| KPS-0518                  | VpsT::3XFLAG C6706                                                                                                                                                                                                                      | This study                |
| KPS-0519                  | $\Delta$ <i>hapR/vpsT</i> ::3XFLAG C6706                                                                                                                                                                                                | This study                |
| KPS-0520                  | $\Delta$ <i>luxO/vpsT</i> ::3XFLAG C6706                                                                                                                                                                                                | This study                |
| KPS-0521                  | $\Delta$ <i>vqmR/vpsT</i> ::3XFLAG C6706                                                                                                                                                                                                | This study                |
| KPS-0522                  | $\Delta$ <i>vqmA/vpsT</i> ::3XFLAG C6706                                                                                                                                                                                                | This study                |
| KPS-0647                  | <i>PvqmR::lacZ</i>                                                                                                                                                                                                                      | This study                |
| KPS-0678                  | $\Delta$ <i>hapR/ptac-mKate2::lacZ</i> C6706                                                                                                                                                                                            | (18)                      |
| KPS-0932                  | $\Delta$ <i>hapR/\Delta</i> <i>vqmR/vpsT</i> ::3XFLAG C6706                                                                                                                                                                             | This study                |
| KPS-0933                  | $\Delta$ <i>luxO/\Delta</i> <i>vqmR/vpsT</i> ::3XFLAG C6706                                                                                                                                                                             | This study                |
| ZLV-101                   | $\Delta$ <i>vqmR/vqmA</i> C6706                                                                                                                                                                                                         | (19)                      |
| <b>other vibrios</b>      |                                                                                                                                                                                                                                         |                           |
| Vha                       | <i>Vibrio harveyi</i> BB120                                                                                                                                                                                                             | (20)                      |
| Van                       | <i>Vibrio anguillarum</i> 775                                                                                                                                                                                                           | Bassler strain collection |
| Val                       | <i>Vibrio alginolyticus</i> 12G01                                                                                                                                                                                                       | Bassler strain collection |
| Vfu                       | <i>Vibrio furnissii</i> CDC B3215                                                                                                                                                                                                       | Bassler strain collection |
| Vpa                       | <i>Vibrio parahaemolyticus</i> EB101                                                                                                                                                                                                    | Bassler strain collection |
| Vpr                       | <i>Vibrio proteolyticus</i> NCMB 1326                                                                                                                                                                                                   | Bassler strain collection |
| <b><i>E. coli</i></b>     |                                                                                                                                                                                                                                         |                           |
| TOP10                     | <i>mcrA</i> $\Delta$ ( <i>mrr-hsdRMS-mcrBC</i> ) $\Phi$ 80 <i>lacZ</i> $\Delta$ M15 <i>lacX74</i> <i>deoR</i> <i>recA1</i> <i>araD</i> 139 $\Delta$ ( <i>ara-leu</i> )7697 <i>galU</i> <i>galK</i> <i>rpsL</i> <i>endA1</i> <i>nupG</i> | Invitrogen                |
| S17 $\lambda$ pir         | $\Delta$ <i>lacU</i> 169 ( $\Phi$ <i>lacZ</i> $\Delta$ M15), <i>recA1</i> , <i>endA1</i> , <i>hsdR</i> 17, <i>thi</i> -1, <i>gyrA</i> 96, <i>relA</i> 1, $\lambda$ pir                                                                  | (21)                      |
| STR1353                   | F-, DE( <i>araD-araB</i> )567, <i>lacZ</i> 4787(del):: <i>rrnB</i> -3, LAM-, <i>rph</i> -1, DE( <i>rhaD-rhaB</i> )568, <i>hsdR</i> 514, $\Delta$ <i>hfq</i>                                                                             | Bassler strain collection |

**Table S3:** Plasmids used in this study

| Plasmid trivial name       | Plasmid stock name | Relevant fragment   | Comment                                                 | Origin, marker           | Reference  |
|----------------------------|--------------------|---------------------|---------------------------------------------------------|--------------------------|------------|
| pctr                       | pCMW-1             |                     | Control plasmid                                         | P15A, Kan <sup>R</sup>   | (22)       |
| pBAD-VqmR                  | pKP-331            | VqmR                | pBAD-VqmR expression plasmid                            | P15A, Kan <sup>R</sup>   | This study |
| pVqmR                      | pKP-333            | VqmR                | VqmR expression plasmid                                 | P15A, Kan <sup>R</sup>   | This study |
| pVqmR $\Delta$ R1          | pKP-344            | VqmR $\Delta$ R1    | VqmR $\Delta$ R1                                        | P15A, Kan <sup>R</sup>   | This study |
| pVqmR $\Delta$ R2          | pKP-345            | VqmR $\Delta$ R2    | VqmR $\Delta$ R2                                        | P15A, Kan <sup>R</sup>   | This study |
| p <i>vpsL::gfp</i>         | pKP-386            | <i>vpsL::gfp</i>    | transcriptional reporter <i>vpsL</i>                    | P15A, Kan <sup>R</sup>   | This study |
| p <i>vpsT::gfp</i>         | pKP-337            | <i>vpsT::gfp</i>    | translational reporter <i>vpsT::gfp</i>                 | PSC101*, Cm <sup>R</sup> | This study |
| P <i>vca0068::gfp</i>      | pKP-338            | <i>vca0068::gfp</i> | translational reporter <i>vca0068::gfp</i>              | PSC101*, Cm <sup>R</sup> | This study |
| P <i>vca0917::gfp</i>      | pKP-444            | <i>vca0917::gfp</i> | translational reporter <i>vca0917::gfp</i>              | PSC101*, Cm <sup>R</sup> | This study |
| P <i>vc0200::gfp</i>       | pKP-346            | <i>vc0200::gfp</i>  | translational reporter <i>vc0200::gfp</i>               | PSC101*, Cm <sup>R</sup> | This study |
| P <i>vc1063::gfp</i>       | pKP-347            | <i>vc1063::gfp</i>  | translational reporter <i>vc1063::gfp</i>               | PSC101*, Cm <sup>R</sup> | This study |
| P <i>vc1449::gfp</i>       | pKP-353            | <i>vc1449::gfp</i>  | translational reporter <i>vc1449::gfp</i>               | PSC101*, Cm <sup>R</sup> | This study |
| P <i>vca0591::gfp</i>      | pKP-354            | <i>vca0591::gfp</i> | translational reporter <i>vca0591::gfp</i>              | PSC101*, Cm <sup>R</sup> | This study |
| P <i>vc1865::gfp</i>       | pKP-358            | <i>vc1865::gfp</i>  | translational reporter <i>vc1865::gfp</i>               | PSC101*, Cm <sup>R</sup> | This study |
| P <i>vqmA::gfp</i>         | pKP-357            | <i>vqmA::gfp</i>    | translational reporter <i>vqmA::gfp</i>                 | P15A, Kan <sup>R</sup>   | This study |
| P <i>vqmA::gfp</i> (ATC)   | pKP-359            | <i>vqmA::gfp</i>    | translational reporter <i>vqmA::gfp</i>                 | P15A, Kan <sup>R</sup>   | This study |
| P <i>vqmA::gfp</i> (GTG)   | pKP-366            | <i>vqmA::gfp</i>    | translational reporter <i>vqmA::gfp</i>                 | P15A, Kan <sup>R</sup>   | This study |
| pBAD-ctr                   | pKP8-35            |                     |                                                         | PBR322, Amp <sup>R</sup> | (5)        |
| pBAD- <i>vqmA</i>          | pKP-367            | VqmA                | pBAD- <i>vqmA</i> expression plasmid                    | PBR322, Amp <sup>R</sup> | This study |
| p <i>vqmR::gfp</i>         | pKP-361            | <i>vqmR::gfp</i>    | transcriptional reporter <i>vqmR</i>                    | P15A, Kan <sup>R</sup>   | This study |
| pVqmA                      | pKP-418            | VqmA                | <i>vqmA</i> complementation plasmid                     | P15A, Cm <sup>R</sup>    | This study |
| p <i>vpsT::gfp</i> G-17C   | pKP-398            | <i>vpsT::gfp</i>    | translational reporter <i>vpsT::gfp</i> G-17C           | PSC101*, Cm <sup>R</sup> | This study |
| pVqmR C94G                 | pKP-410            | VqmR                | VqmR C94G expression plasmid                            | P15A, Kan <sup>R</sup>   | This study |
| P <i>vc1063::gfp</i> G-10C | pKP-441            | <i>vc1063::gfp</i>  | translational reporter <i>vc1063::gfp</i> G-10C         | PSC101*, Cm <sup>R</sup> | This study |
| pVqmR C63G                 | pKP-442            | VqmR                | VqmR C63G expression plasmid                            | P15A, Kan <sup>R</sup>   | This study |
| pET- <i>vqmA::3xFLAG</i>   | pKP-437            | VqmA                | Over-expression construct for VqmA::3XFLAG purification | PBR322, Amp <sup>R</sup> | This study |
| pKAS32                     | -                  |                     | suicide plasmid for allelic exchange                    | R6K                      | (6)        |

**Table S4: DNA oligonucleotides used in this study**  
Sequences are given in 5' → 3' direction; 5'P denotes a 5' monophosphate.

|          | Sequence                                                           | Description                     |
|----------|--------------------------------------------------------------------|---------------------------------|
| KPO-009  | CTACGGCGTTTCACTTCTGAGTTC                                           | 5S rRNA probing E. coli         |
| KPO-0092 | CCACACATTATACGAGCCGA                                               | plasmid construction            |
| KPO-0285 | GTTTTTTCTAGAGCTAGCAAAGGAGAAGAACTCT                                 | plasmid construction            |
| KPO-0456 | P-CAGAGCATGAGTTGCATGAC                                             | plasmid construction            |
| KPO-0457 | GTTTTTGGTACCAGCTTATCTTGCCATTCCGG                                   | plasmid construction            |
| KPO-0460 | GTTTTTTGTCGACTGGTAGGTAATGTTGGGAATG                                 | plasmid construction            |
| KPO-0461 | GTTTTTTGCATGCATGCTCTGGTTGTACTTTACC                                 | plasmid construction            |
| KPO-0465 | GTTTTTGGATCCAGCTTATCTTGCCATTCCGG                                   | plasmid construction            |
| KPO-0468 | CTGATCCTTGGTATCAATATGAT                                            | plasmid construction            |
| KPO-0469 | CCAAGATCAGTCATGCAACTC                                              | plasmid construction            |
| KPO-0470 | GGCGTCCCTAACCATCTGA                                                | plasmid construction            |
| KPO-0471 | TTAGGGACGCCATATCCTC                                                | plasmid construction            |
| KPO-0475 | GTTTTTTGTCGACCAGCATGAGTTGCATGAC                                    | plasmid construction            |
| KPO-0477 | GTTTTTTATGCATGTTAGCCTTGATGTTAGGAG                                  | cloning vpsT::gfp               |
| KPO-0478 | GTTTTTTGCTAGCTCTGGATTGCATGCAAAACAT                                 | cloning vpsT::gfp               |
| KPO-0479 | GTTTTTTATGCATGCATTATTTTTAAATAACGATAATT                             | cloning vca0068::gfp            |
| KPO-0480 | GTTTTTTGCTAGCGAAAAATACCGGTAACAACCTG                                | cloning vca0068::gfp            |
| KPO-0484 | GTTTTTTGCTAGCAACCGCATCCATAATGGCT                                   | cloning vca0917::gfp            |
| KPO-0487 | GTTTTTTATGCATACTACAAAAGAGGGTCCTAAGTC                               | cloning vc1063::gfp             |
| KPO-0488 | GTTTTTTGCTAGCCCCTCTCCAGTTTCTCC                                     | cloning vc1063::gfp             |
| KPO-0489 | GTTTTTTATGCATATTAATACTAATAAAAACGATTCTCAA                           | cloning vc0200::gfp             |
| KPO-0490 | GTTTTTTGCTAGCGTGAAGCGAAGCGCACGA                                    | cloning vc0200::gfp             |
| KPO-0491 | P-TATGTTTCTTGATTTATGCCAG                                           | plasmid construction            |
| KPO-0492 | CATGAATCCAGCGAGGGTC                                                | plasmid construction            |
| KPO-0493 | P-TGGATTTCATGGAACCTCTTC                                            | plasmid construction            |
| KPO-0494 | CTGCTGAACACACAGAGGTAT                                              | plasmid construction            |
| KPO-0495 | GCCAAACAATATAACCTTGA                                               | strain construction             |
| KPO-0496 | GTTTGTACTTTACCGAACGC                                               | strain construction             |
| KPO-0497 | GCGTTCGGTAAAGTACAACATCCAAACAGTCCCCGAATA                            | strain construction             |
| KPO-0498 | CAATCAGTTGGCTTTTGCTCAA                                             | strain construction             |
| KPO-0499 | GTTTTTTGGTACCTCATGCTTTCGCACTCAGCT                                  | strain construction             |
| KPO-0500 | GTTTTTCTAGGAGTTTGGCCTCATACCCCTC                                    | strain construction             |
| KPO-0502 | ATGCGGCGATATGATACCAA                                               | strain construction             |
| KPO-0503 | TTGGTATCATATCGCCGCATGCAACAACGTCAGCTGATTG                           | strain construction             |
| KPO-0504 | TATCTGCGGCGAAAGGCCTA                                               | strain construction             |
| KPO-0505 | GTTTTTCTAGGTTGTGATCTTATTTGTCCGGCC                                  | strain construction             |
| KPO-0521 | TGATATCTTGGCTCAACTCA                                               | strain construction             |
| KPO-0522 | ACGTTAAGAAGAGGGAAGTC                                               | strain construction             |
| KPO-0523 | GACTTCCCTCTTCTTAACGTTTCGGTTGTGAATGTCTCTTC                          | strain construction             |
| KPO-0524 | CACACATACCAACCTCGGT                                                | strain construction             |
| KPO-0525 | GTTTTTGGTACCGCGAAGTTTACGTAAGTCCG                                   | strain construction             |
| KPO-0526 | GTTTTTCTAGGTCATTAATCCATCAAGCCAT                                    | strain construction             |
| KPO-0527 | TCCGCTTGATTAAACGTTTGTG                                             | strain construction             |
| KPO-0528 | GTCGATATCATGATCTTTATAATCACCCTCATGGTCTTTGTAGTCAGAATTGACTTCTCAATTCCA | strain construction             |
| KPO-0529 | ATAAAGATCATGATATCGACTACAAGATGACGATAAATAGTAATTCGGTTGTGAATGTCTCTTC   | strain construction             |
| KPO-0531 | GTTTTTTATGCATTTAAATAAATAAATAACAATAAACC                             | cloning vc1449::gfp             |
| KPO-0531 | GTTTTTTATGCATTTAAATAAATAAATAACAATAAACC                             | strain construction             |
| KPO-0532 | GTTTTTTGCTAGCAGAAAAACACACCTTTATTGTAGT                              | cloning vc1449::gfp             |
| KPO-0533 | GTTTTTTATGCATAAATAAAGGTATCATAATGATCA                               | cloning vc1865::gfp             |
| KPO-0534 | GTTTTTTGCTAGCAAGCTCCCGGTAGCTTTTC                                   | cloning vc1865::gfp             |
| KPO-0537 | GTTTTTTATGCATGTTAACTGAATTAATAAATTTCA                               | cloning vca0591::gfp            |
| KPO-0538 | GTTTTTTGCTAGCACTGAATTGGCTCGATAAC                                   | cloning vca0591::gfp            |
| KPO-0545 | P-GCATTTCAGTGGAGGATAT                                              | plasmid construction            |
| KPO-0546 | GTTTTTTCTAGAATCAGCTTGACGTTGTTGC                                    | plasmid construction            |
| KPO-0547 | GTTTTTTGGTACCAATCAGCTTGACGTTGTTGC                                  | plasmid construction            |
| KPO-0554 | GAGAATAAACCAGAAAGTCCGAG                                            | sense oligo qRT-PCR vpsT        |
| KPO-0555 | TCTTTCGCATCAGGACAACGTG                                             | antisense oligo qRT-PCR vpsT    |
| KPO-0556 | TCATTTCGATCAGTGCCCTGG                                              | sense oligo qRT-PCR vca0068     |
| KPO-0557 | GGTTGCGGTTGATGTCTTTG                                               | antisense oligo qRT-PCR vca0068 |
| KPO-0558 | CCGCTTCGATTTTGTATGGTG                                              | sense oligo qRT-PCR vc0200      |
| KPO-0559 | ATCATTACCCACTTGTAGGCC                                              | antisense oligo qRT-PCR vc0200  |
| KPO-0560 | TGCCAAACCGACTGTAAGT                                                | sense oligo qRT-PCR vc1188      |
| KPO-0561 | GATAGCGGGAAGACAATAGGG                                              | antisense oligo qRT-PCR vc1188  |
| KPO-0562 | AGAGGCGATTTCATTTGCTTTG                                             | sense oligo qRT-PCR vca0676     |
| KPO-0563 | CATTGCGTTACTGGGACAAAC                                              | antisense oligo qRT-PCR vca0676 |
| KPO-0566 | CAAGATGTTCCAGTCCCGTGA                                              | sense oligo qRT-PCR vca0591     |
| KPO-0567 | GTGTTTTGGAAATAGCTGCGG                                              | antisense oligo qRT-PCR vca0591 |
| KPO-0570 | GGCTGAAAGCGATAATGATCTTG                                            | sense oligo qRT-PCR vc1449      |
| KPO-0571 | CGGCTTCCATTCAGGATCTTC                                              | antisense oligo qRT-PCR vc1449  |
| KPO-0572 | TTACGAAGATGAGCATGGGC                                               | sense oligo qRT-PCR vc1450      |
| KPO-0573 | AGTCGGATGGAGATATTTCCG                                              | antisense oligo qRT-PCR vc1450  |
| KPO-0574 | AGTTTGGATGTTGGGTATGC                                               | sense oligo qRT-PCR vc1865      |
| KPO-0575 | CAGCTCTTGGAAAGATACGGTG                                             | antisense oligo qRT-PCR vc1865  |
| KPO-0578 | ATACCTCTGTGTTCAGCAG                                                | sense oligo qRT-PCR vqmR        |
| KPO-0579 | AGACGGGCTGGCATAAATAC                                               | antisense oligo qRT-PCR vqmR    |
| KPO-0580 | TGGATGACTGGCTACTGTTTG                                              | sense oligo qRT-PCR vc1063      |

|          |                                          |                                       |
|----------|------------------------------------------|---------------------------------------|
| KPO-0581 | GGCTGTTGCGACCAAATTG                      | antisense oligo qRT-PCR vc1063        |
| KPO-0582 | CCTGCTGTTTCACCACATTG                     | sense oligo qRT-PCR vca0917           |
| KPO-0583 | TGTCCGAATTTCTCTCCGTC                     | antisense oligo qRT-PCR vca0917       |
| KPO-0584 | GCAAGGTCAGATCGAATCATTG                   | sense oligo qRT-PCR hfq               |
| KPO-0585 | GGTGGCTAACTGGACGAG                       | antisense oligo qRT-PCR hfq           |
| KPO-0671 | GTTTTTGTGCGACTTCAATGTAAATCCAAAATGTAATACA | plasmid construction                  |
| KPO-0696 | GTTTTTGGCGCCGCAATATCTGCATCAATTCTAAGACT   | plasmid construction                  |
| KPO-0725 | TTGATCTGTTAGGAGGGGTG                     | plasmid construction                  |
| KPO-0726 | TAACAGATCAAGGCTAACATGCA                  | plasmid construction                  |
| KPO-0750 | CTACAGGTCGACAAGATATGTTT                  | plasmid construction                  |
| KPO-0751 | TCGACCTGTAGAAGAGTTCC                     | plasmid construction                  |
| KPO-0803 | GTTTTTATGCATACCAAAATATGATTTATTGCGGTT     | cloning vca0917::gfp                  |
| KPO-0947 | AGAGGCTCCTAAGTCATGAGTA                   | plasmid construction                  |
| KPO-0948 | TAGGAGCCTCTTTGTAGTATGC                   | plasmid construction                  |
| KPO-0949 | CAGAGCCTCGCTGGATTAT                      | plasmid construction                  |
| KPO-0950 | GAGGCTCTGCTGAACACACA                     | plasmid construction                  |
| KPO-0216 | AGTCGAGGACTCAGTTTATGATTA                 | sRNA probing                          |
| KPO-0243 | TTCGTTTCACTTCTGAGTTCGG                   | 5S rRNA probing vibrios               |
| KPO-0331 | GAGCCAATCTACAATTCATCAGA                  | sRNA probing                          |
| KPO-0346 | TTTGTGTCCGAAATGTACTGACG                  | sRNA probing                          |
| KPO-0379 | TTAATAACCCTAGCCATGAGTTGTC                | sRNA probing                          |
| KPO-0452 | ATCTTGTGCGACGTGTAGAAGAGGTT               | sRNA probing ( <i>vqmR</i> region R2) |
| KPO-0539 | ACACAGAGGTATCATATTGATACC                 | sRNA probing (5' end <i>vqmR</i> )    |
| KPO-0813 | GTGTATCTCAAACCAACCTAATAAG                | sRNA probing                          |
| KPO-0814 | GTGTTTCGTAGTCTTCACTTCTCT                 | sRNA probing                          |
| KPO-0818 | GTTCAAGTTCATAGTAAAGTCGTTT                | sRNA probing                          |
| KPO-0819 | TAGGGGAATGGCTCCAAGAG                     | sRNA probing                          |
| KPO-0820 | GGCCTTCTTAGAGTCTTCTAAGAA                 | sRNA probing                          |
| KPO-0821 | AGGTTGTGAGAGAGGCCTTGA                    | sRNA probing                          |
| KPO-0822 | GCCAGGTGAATAATGCGCTTG                    | sRNA probing                          |
| KPO-0824 | CTATCAACTCGAAGTACGCTAGA                  | sRNA probing                          |
| KPO-0826 | TCGGACTCATCCTTTGAGCGT                    | sRNA probing                          |
| KPO-0828 | GGACCTTGCTCCACCTGATAA                    | sRNA probing                          |
| KPO-0833 | CATCAATGCATATTTATCCAAGTAAG               | sRNA probing                          |
| KPO-0835 | GAGCTAGTTTGTCTACCCTTT                    | sRNA probing                          |
| KPO-0837 | GGATTCAAATAACATGGGCGACT                  | sRNA probing                          |
| KPO-0838 | GGTTGCGATCAAAGTACCGATA                   | sRNA probing                          |
| KPO-0842 | GTAAGCAATTAACCTACGCCAATTG                | sRNA probing                          |
| KPO-0845 | TTGGCCCGTCACAGGCTGAA                     | sRNA probing                          |
| KPO-0857 | GATGGCTCTAAGAAAGTCGCTT                   | sRNA probing                          |
| KPO-0858 | CCACTTGAACCTTATGTACCTC                   | sRNA probing                          |
| KPO-0867 | TCATCGCAGGATTAGCAACGATT                  | sRNA probing                          |
| KPO-0873 | CTCTCCATGGGACAGAGTCT                     | sRNA probing                          |
| KPO-0874 | GTTTGGCGCTTGTGCTTG                       | sRNA probing                          |
| KPO-0875 | AGGGTTACAACGCACCATTTCA                   | sRNA probing                          |
| KPO-0876 | AGTTTTCTGATAAGCAAGGTAGAG                 | sRNA probing                          |
| KPO-0881 | CATTGTCATCTGTAACAATCCACA                 | sRNA probing                          |
| KPO-0915 | GTTGTTAGTAATGGTTATTGAGAAT                | sRNA probing                          |
| KPO-0917 | ATATATGCAAGCGTCTCTTAGCC                  | sRNA probing                          |
| KPO-0918 | AGTTCCACTTATCCTCCTAAGC                   | sRNA probing                          |
| KPO-0923 | ACAACAGGACCCAGTTGTTTATGAT                | sRNA probing                          |
| KPO-0924 | TAACAACGTCAGTTGGCTAGGT                   | sRNA probing                          |
| KPO-0934 | CTTGCTTCCCAATAACCGG                      | plasmid construction                  |
| KPO-0935 | GTTTTTCCATGGCTAACCATCTGACATTAGAGCAG      | plasmid construction                  |

**Table S5: Mapping statistics for *V. cholerae* dRNA-seq**

| Libraries                                                               | D47ES1_0.1<br>minus_TEX | D47E_S1_0.1<br>plus_TEX | D47E_S1_2.0<br>minus_TEX | D47E_S1_2.0<br>plus_TEX | D47E_S2_0.1<br>minus_TEX | D47E_S2_0.1<br>plus_TEX | D47E_S2_2.0<br>minus_TEX | D47E_S2_2.0<br>plus_TEX | D47E_S2_2.0<br>plus_TEX | WT_S1_0.1<br>minus_TEX | WT_S1_0.1<br>plus_TEX | WT_S1_2.0<br>minus_TEX | WT_S1_2.0<br>plus_TEX | WT_S2_0.1<br>minus_TEX | WT_S2_0.1<br>plus_TEX | WT_S2_2.0<br>minus_TEX | WT_S2_2.0<br>plus_TEX |
|-------------------------------------------------------------------------|-------------------------|-------------------------|--------------------------|-------------------------|--------------------------|-------------------------|--------------------------|-------------------------|-------------------------|------------------------|-----------------------|------------------------|-----------------------|------------------------|-----------------------|------------------------|-----------------------|
| No. of input reads                                                      | 12020323                | 10134004                | 6041793                  | 7312970                 | 15984818                 | 15403926                | 7972525                  | 9330337                 | 13012710                | 6423924                | 6719857               | 6679325                | 10717828              | 20739202               | 7331811               | 7759407                |                       |
| No. of reads - PolyA detected and removed                               | 8674534                 | 7536490                 | 4189449                  | 3102702                 | 12298501                 | 11040700                | 5494342                  | 4409395                 | 8622196                 | 3962800                | 5160930               | 3220767                | 8706350               | 16302487               | 5249579               | 4046300                |                       |
| No. of reads - Single 3' A removed                                      | 407920                  | 497820                  | 282028                   | 656295                  | 575781                   | 1037249                 | 387562                   | 771477                  | 576353                  | 481959                 | 253071                | 669546                 | 256527                | 1068032                | 332091                | 659685                 |                       |
| No. of reads - Unmodified                                               | 2937869                 | 2099694                 | 1570316                  | 3553973                 | 3110536                  | 3325977                 | 2090621                  | 4149465                 | 3814161                 | 1979165                | 1305856               | 2789012                | 1754951               | 3368683                | 1750141               | 3053422                |                       |
| No. of reads - Removed as too short                                     | 733608                  | 1198196                 | 299168                   | 221690                  | 1306388                  | 1898173                 | 473496                   | 388582                  | 637372                  | 830044                 | 400704                | 325092                 | 802474                | 3117308                | 348585                | 486877                 |                       |
| No. of reads - Long enough and used for alignment                       | 11286715                | 8935808                 | 5742625                  | 7091280                 | 14678430                 | 13505753                | 7499029                  | 8941755                 | 12375338                | 5593880                | 6319153               | 6354233                | 9915354               | 17621894               | 6983226               | 7272530                |                       |
| Total no. of aligned reads                                              | 10536538                | 8186187                 | 5472276                  | 6890068                 | 13259927                 | 12157299                | 7159818                  | 8627012                 | 11591377                | 5191739                | 5942884               | 6173775                | 9120565               | 15516660               | 6643865               | 7036898                |                       |
| Total no. of unaligned reads                                            | 602356                  | 710740                  | 257038                   | 196671                  | 1323488                  | 1304246                 | 327270                   | 308792                  | 614663                  | 380711                 | 360059                | 175089                 | 699857                | 2030722                | 325040                | 230462                 |                       |
| Total no. of uniquely aligned reads                                     | 2838220                 | 2525662                 | 4018715                  | 4970468                 | 3506745                  | 3646857                 | 5321223                  | 5848685                 | 3641476                 | 2091139                | 4110536               | 3996992                | 1968041               | 4156019                | 4369033               | 4179564                |                       |
| Total no. of alignments                                                 | 35069849                | 25876009                | 12036938                 | 17467196                | 41408199                 | 36949222                | 15484789                 | 24190661                | 38080442                | 16187184               | 13369414              | 18172308               | 28413639              | 47196025               | 17211719              | 22726156               |                       |
| Total no. of split alignments                                           | 35539                   | 20279                   | 23993                    | 9857                    | 23417                    | 37026                   | 11812                    | 10555                   | 38348                   | 10394                  | 10721                 | 9642                   | 29612                 | 49468                  | 15720                 | 8604                   |                       |
| Percentage of aligned reads (compared to total input reads)             | 87.66                   | 80.78                   | 90.57                    | 94.22                   | 82.95                    | 78.92                   | 89.81                    | 92.46                   | 89.08                   | 80.82                  | 88.44                 | 92.43                  | 85.1                  | 74.82                  | 90.62                 | 90.69                  |                       |
| Percentage of uniquely aligned reads (in relation to all aligned reads) | 26.94                   | 30.85                   | 73.44                    | 72.14                   | 26.45                    | 30                      | 74.32                    | 67.8                    | 31.42                   | 40.28                  | 69.17                 | 64.74                  | 21.58                 | 26.78                  | 65.76                 | 59.39                  |                       |

## Supplementary References

1. Rehmsmeier M, Steffen P, Hochsmann M, & Giegerich R (2004) Fast and effective prediction of microRNA/target duplexes. *RNA* 10(10):1507-1517.
2. Shao Y, Feng L, Rutherford ST, Papenfort K, & Bassler BL (2013) Functional determinants of the quorum-sensing non-coding RNAs and their roles in target regulation. *EMBO J* 32(15):2158-2171.
3. Dunn AK, Millikan DS, Adin DM, Bose JL, & Stabb EV (2006) New rfp- and pES213-derived tools for analyzing symbiotic *Vibrio fischeri* reveal patterns of infection and lux expression in situ. *Appl Environ Microbiol* 72(1):802-810.
4. Corcoran CP, et al. (2012) Superfolder GFP reporters validate diverse new mRNA targets of the classic porin regulator, MicF RNA. *Mol Microbiol* 84(3):428-445.
5. Papenfort K, et al. (2006) SigmaE-dependent small RNAs of *Salmonella* respond to membrane stress by accelerating global omp mRNA decay. *Mol Microbiol* 62(6):1674-1688.
6. Skorupski K & Taylor RK (1996) Positive selection vectors for allelic exchange. *Gene* 169(1):47-52.
7. Drescher K, Nadell CD, Stone HA, Wingreen NS, & Bassler BL (2014) Solutions to the public goods dilemma in bacterial biofilms. *Curr Biol* 24(1):50-55.
8. Frohlich KS, Papenfort K, Fekete A, & Vogel J (2013) A small RNA activates CFA synthase by isoform-specific mRNA stabilization. *EMBO J* 32(22):2963-2979.
9. Berezikov E, et al. (2006) Diversity of microRNAs in human and chimpanzee brain. *Nat Genet* 38(12):1375-1377.
10. Edgar R, Domrachev M, & Lash AE (2002) Gene Expression Omnibus: NCBI gene expression and hybridization array data repository. *Nucleic Acids Res* 30(1):207-210.
11. Forstner KU, Vogel J, & Sharma CM (2014) READemption-a tool for the computational analysis of deep-sequencing-based transcriptome data. *Bioinformatics* .
12. Hoffmann S, et al. (2009) Fast mapping of short sequences with mismatches, insertions and deletions using index structures. *PLoS Comput Biol* 5(9):e1000502.
13. Robinson JT, et al. (2011) Integrative genomics viewer. *Nat Biotechnol* 29(1):24-26.
14. Dugar G, et al. (2013) High-resolution transcriptome maps reveal strain-specific regulatory features of multiple *Campylobacter jejuni* isolates. *PLoS Genet* 9(5):e1003495.
15. Bailey TL, et al. (2009) MEME SUITE: tools for motif discovery and searching. *Nucleic Acids Res* 37(Web Server issue):W202-208.
16. Thelin KH & Taylor RK (1996) Toxin-coregulated pilus, but not mannose-sensitive hemagglutinin, is required for colonization by *Vibrio cholerae* O1 El Tor biotype and O139 strains. *Infect Immun* 64(7):2853-2856.
17. Svenningsen SL, Tu KC, & Bassler BL (2009) Gene dosage compensation calibrates four regulatory RNAs to control *Vibrio cholerae* quorum sensing. *EMBO J* 28(4):429-439.
18. Nadell CD & Bassler BL (2011) A fitness trade-off between local competition and dispersal in *Vibrio cholerae* biofilms. *Proc Natl Acad Sci U S A* .
19. Liu Z, Hsiao A, Joelsson A, & Zhu J (2006) The transcriptional regulator VqmA increases expression of the quorum-sensing activator HapR in *Vibrio cholerae*. *J Bacteriol* 188(7):2446-2453.
20. Bassler BL, Greenberg EP, & Stevens AM (1997) Cross-species induction of luminescence in the quorum-sensing bacterium *Vibrio harveyi*. *J Bacteriol* 179(12):4043-4045.
21. de Lorenzo V & Timmis KN (1994) Analysis and construction of stable phenotypes in gram-negative bacteria with Tn5- and Tn10-derived minitransposons. *Methods Enzymol* 235:386-405.
22. Waters CM & Bassler BL (2006) The *Vibrio harveyi* quorum-sensing system uses shared regulatory components to discriminate between multiple autoinducers. *Genes Dev* 20(19):2754-2767.

**Figure S1**

Papenfort *et al.*, 2015

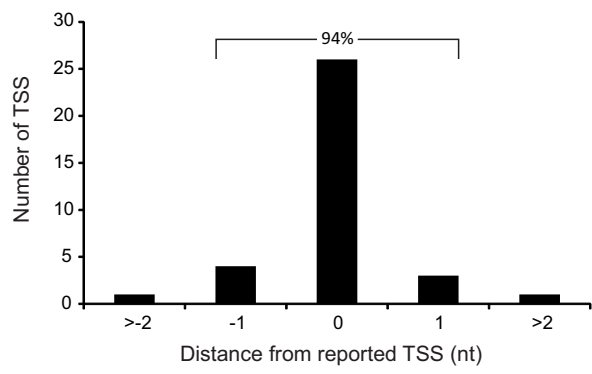



**Figure S2**

Papenfort *et al.*, 2015

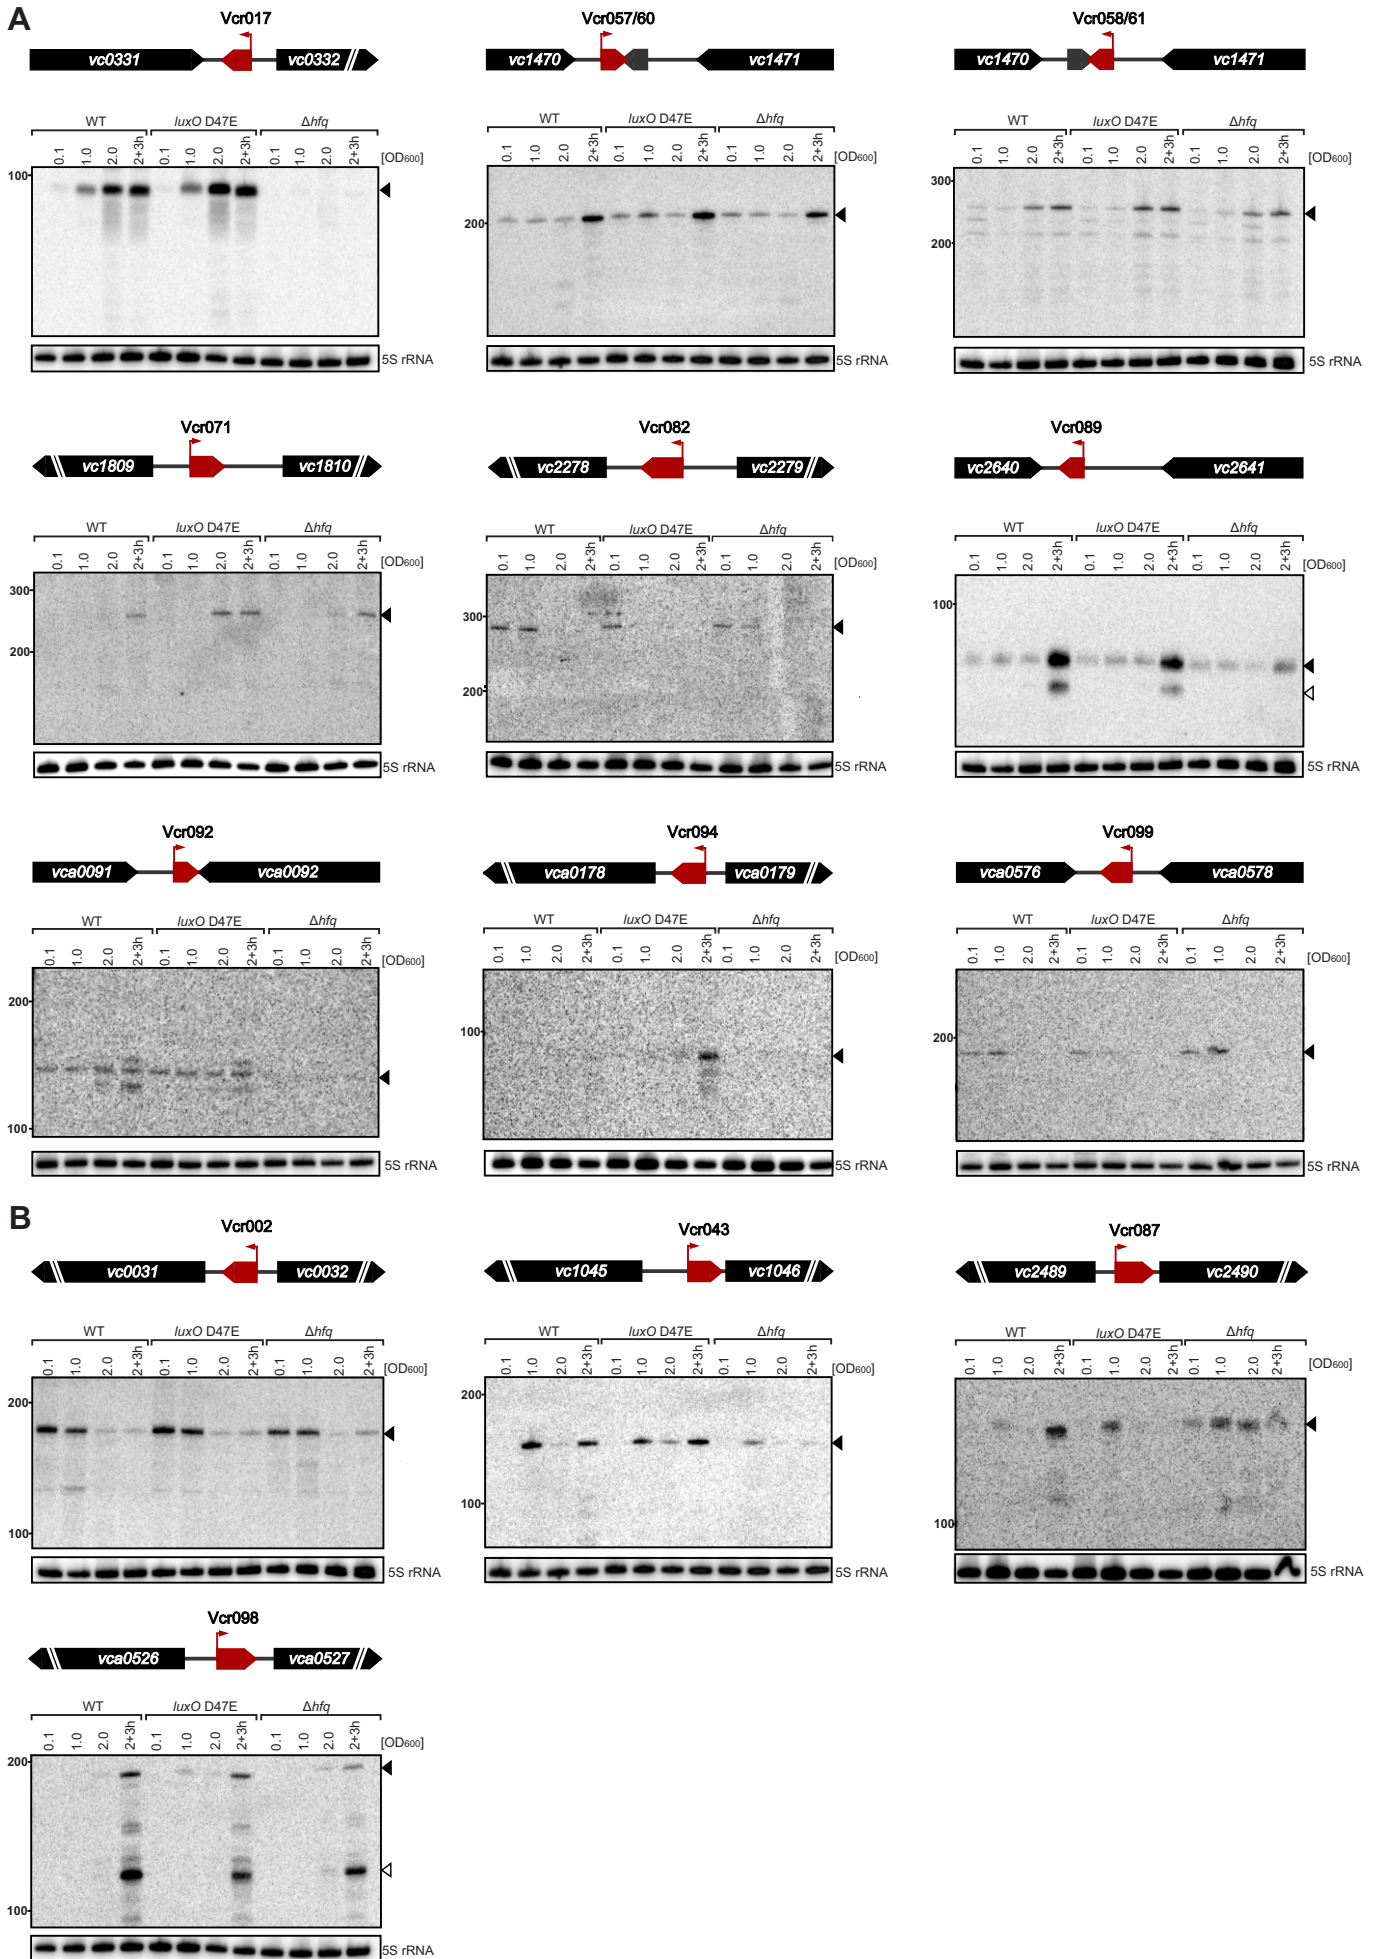

Figure S3

Papenfort *et al.*, 2015

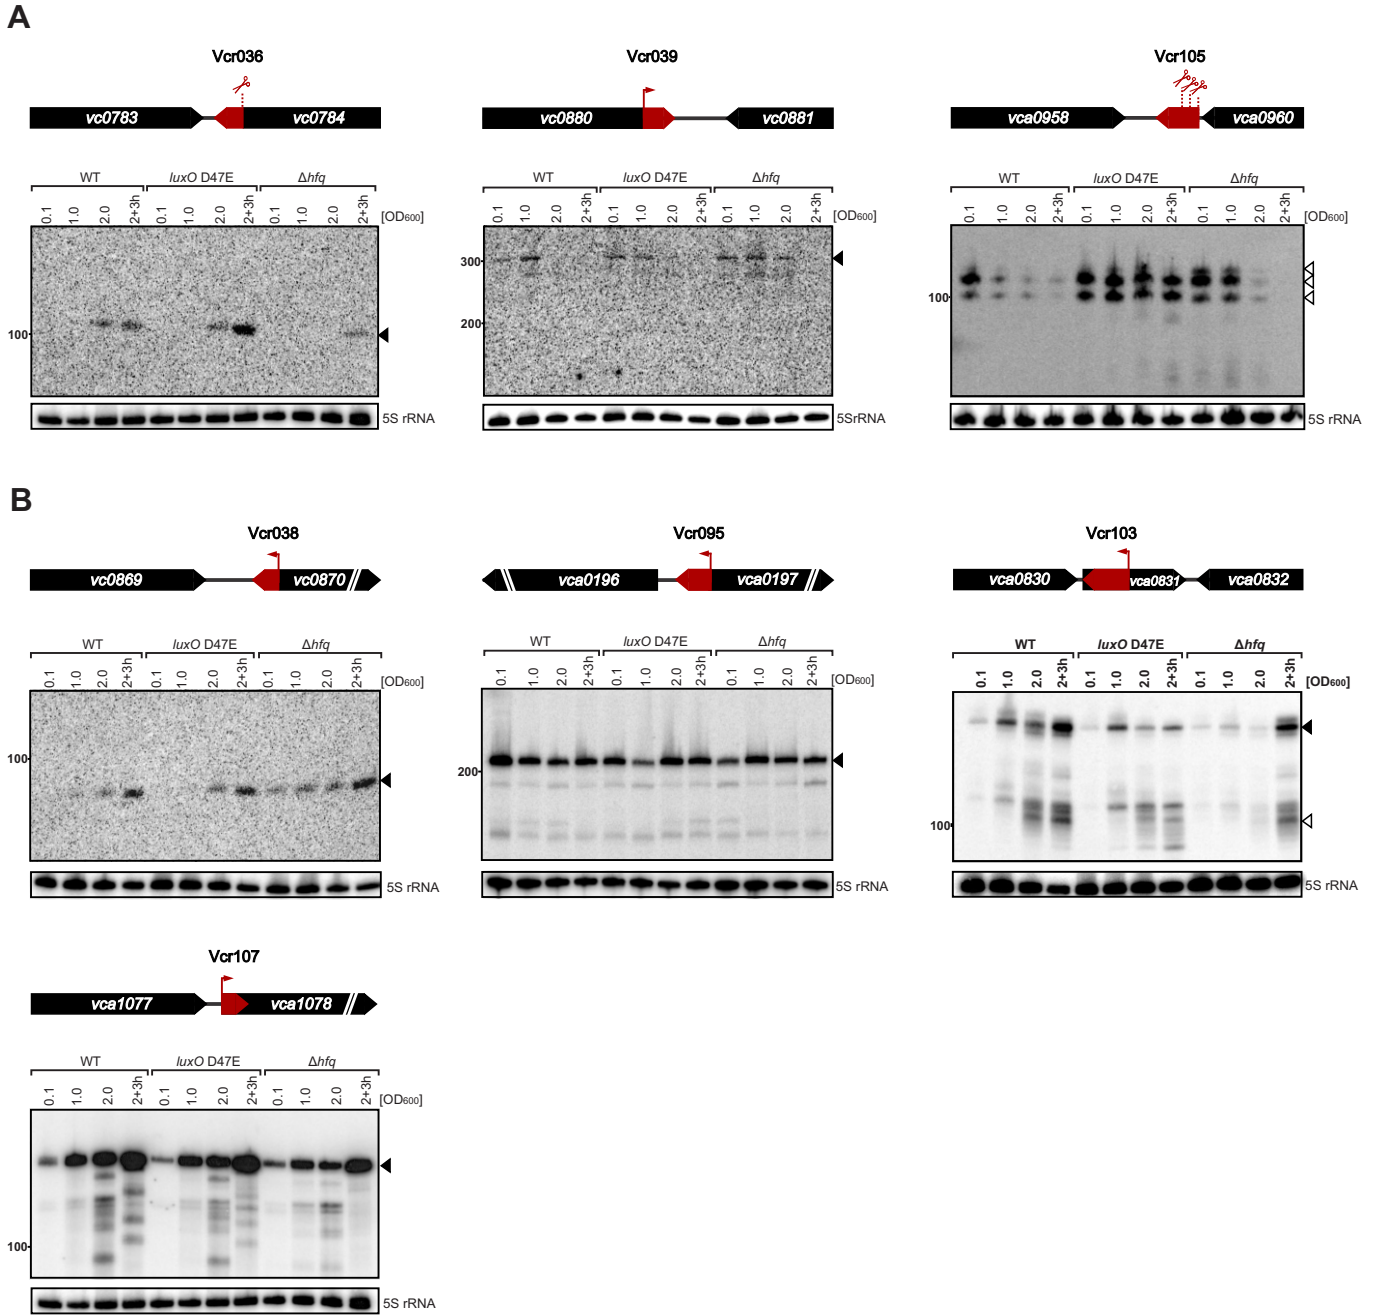

**Figure S4**

Papenfort *et al.*, 2015

**A**

```

1
VCA1078      1  MLGINMIPLCVQQTLAGFMEPLLVHVDKICFLYLCQPVFRALFFHPNSPRIGKISLQSTLLLVSYRRISSGGYGVPNHNLTEQISLFKQLPGYWGCKDLNSVFVYANQAYG 110
Vch1786_II  MLGINMIPLCVQQTLAGFMEPLLVHVDKICFLYLCQPVFRALFFHPNSPRIGKISLQSTLLLVSYRRISSGGYGVPNHNLTEQISLFKQLPGYWGCKDLNSVFVYANQAYG
VCD_000264  MLGINMIPLCVQQTLAGFMEPLLVHVDKICFLYLCQPVFRALFFHPNSPRIGKISLQSTLLLVSYRRISSGGYGVPNHNLTEQISLFKQLPGYWGCKDLNSVFVYANQAYG
VC395_A110  MFSRPSLDLWNLFYTSTRYVSCIY-ASPSSGWLFQITVPRIGKISLQSTLLLVSYRRISSGGYGVPNHNLTEQISLFKQLPGYWGCKDLNSVFVYANQAYG
O3Y_18523   MFSRPSLDLWNLFYTSTRYVSCIY-ASPSSGWLFQITVPRIGKISLQSTLLLVSYRRISSGGYGVPNHNLTEQISLFKQLPGYWGCKDLNSVFVYANQAYG
VCM66_A103  MFSRPSLDLWNLFYTSTRYVSCIY-ASPSSGWLFQITVPRIGKISLQSTLLLVSYRRISSGGYGVPNHNLTEQISLFKQLPGYWGCKDLNSVFVYANQAYG
VC0395_016  MFSRPSLDLWNLFYTSTRYVSCIY-ASPSSGWLFQITVPRIGKISLQSTLLLVSYRRISSGGYGVPNHNLTEQISLFKQLPGYWGCKDLNSVFVYANQAYG
VCLMA_B082  MFSRPSLDLWNLFYTSTRYVSCIY-ASPSSGWLFQITVPRIGKISLQSTLLLVSYRRISSGGYGVPNHNLTEQISLFKQLPGYWGCKDLNSVFVYANQAYG
vfu_B00971  MFSRPSLDLWNLFYTSTRYVSCIY-ASPSSGWLFQITVPRIGKISLQSTLLLVSYRRISSGGYGVPNHNLTEQISLFKQLPGYWGCKDLNSVFVYANQAYG
N175_16845  MFSRPSLDLWNLFYTSTRYVSCIY-ASPSSGWLFQITVPRIGKISLQSTLLLVSYRRISSGGYGVPNHNLTEQISLFKQLPGYWGCKDLNSVFVYANQAYG
VAA_01919   MFSRPSLDLWNLFYTSTRYVSCIY-ASPSSGWLFQITVPRIGKISLQSTLLLVSYRRISSGGYGVPNHNLTEQISLFKQLPGYWGCKDLNSVFVYANQAYG

221
VCA1078      111 ELIGLKRAEDCIGRTDFEMPSPTAACAEFQQQDRYVIETGHSVKVLDIHYPDPGHWHAHIFTKTPWRDSQGKIQGTIFFGQDLTDTAILEVGHVWVCRATGLSTS-TTFK 220
Vch1786_II  111 ELIGLKRAEDCIGRTDFEMPSPTAACAEFQQQDRYVIETGHSVKVLDIHYPDPGHWHAHIFTKTPWRDSQGKIQGTIFFGQDLTDTAILEVGHVWVCRATGLSTS-TTFK
VCD_000264  111 ELIGLKRAEDCIGRTDFEMPSPTAACAEFQQQDRYVIETGHSVKVLDIHYPDPGHWHAHIFTKTPWRDSQGKIQGTIFFGQDLTDTAILEVGHVWVCRATGLSTS-TTFK
VC395_A110  111 ELIGLKRAEDCIGRTDFEMPSPTAACAEFQQQDRYVIETGHSVKVLDIHYPDPGHWHAHIFTKTPWRDSQGKIQGTIFFGQDLTDTAILEVGHVWVCRATGLSTS-TTFK
O3Y_18523   111 ELIGLKRAEDCIGRTDFEMPSPTAACAEFQQQDRYVIETGHSVKVLDIHYPDPGHWHAHIFTKTPWRDSQGKIQGTIFFGQDLTDTAILEVGHVWVCRATGLSTS-TTFK
VCM66_A103  111 ELIGLKRAEDCIGRTDFEMPSPTAACAEFQQQDRYVIETGHSVKVLDIHYPDPGHWHAHIFTKTPWRDSQGKIQGTIFFGQDLTDTAILEVGHVWVCRATGLSTS-TTFK
VC0395_016  111 ELIGLKRAEDCIGRTDFEMPSPTAACAEFQQQDRYVIETGHSVKVLDIHYPDPGHWHAHIFTKTPWRDSQGKIQGTIFFGQDLTDTAILEVGHVWVCRATGLSTS-TTFK
VCLMA_B082  111 ELIGLKRAEDCIGRTDFEMPSPTAACAEFQQQDRYVIETGHSVKVLDIHYPDPGHWHAHIFTKTPWRDSQGKIQGTIFFGQDLTDTAILEVGHVWVCRATGLSTS-TTFK
vfu_B00971  111 ELIGVASAQCQVGRDFDFMPSPTACAEFQQQDRYVMTGRSLKVLVDIHYPDPGHWHAHIFTKTPWRDADGNIQGTIFYGQDLTDTAILEVGHVWVCRATGLTAPFKSSN
N175_16845  111 KLIGVSDAKQCIGLDFEMPSPTACAEFQQQDRYVISTKKPLKVLVDIHYPADGSRWHIIFTKTPWFNAQGEVQGTIFFGQDLTDTAILEVGHVWVCRATGLTIT-QHSA
VAA_01919   111 KLIGVSDAKQCIGLDFEMPSPTACAEFQQQDRYVISTKKPLKVLVDIHYPADGSRWHIIFTKTPWFNAQGEVQGTIFFGQDLTDTAILEVGHVWVCRATGLTIT-QHSA

320
VCA1078      221 SVADRDTLKLTARESEVLFLLLYGKKPQHIAIARVMGISIKTVEGYEAKLRSKFGALSKDQLIDLALDRGFGSVIPKTLRLKQLSVVLSDHITPKKVDVVAQ 320
Vch1786_II  221 SVADRDTLKLTARESEVLFLLLYGKKPQHIAIARVMGISIKTVEGYEAKLRSKFGALSKDQLIDLALDRGFGSVIPKTLRLKQLSVVLSDHITPKKVDVVAQ
VCD_000264  221 SVADRDTLKLTARESEVLFLLLYGKKPQHIAIARVMGISIKTVEGYEAKLRSKFGALSKDQLIDLALDRGFGSVIPKTLRLKQLSVVLSDHITPKKVDVVAQ
VC395_A110  221 SVADRDTLKLTARESEVLFLLLYGKKPQHIAIARVMGISIKTVEGYEAKLRSKFGALSKDQLIDLALDRGFGSVIPKTLRLKQLSVVLSDHITPKKVDVVAQ
O3Y_18523   221 SVADRDTLKLTARESEVLFLLLYGKKPQHIAIARVMGISIKTVEGYEAKLRSKFGALSKDQLIDLALDRGFGSVIPKTLRLKQLSVVLSDHITPKKVDVVAQ
VCM66_A103  221 SVADRDTLKLTARESEVLFLLLYGKKPQHIAIARVMGISIKTVEGYEAKLRSKFGALSKDQLIDLALDRGFGSVIPKTLRLKQLSVVLSDHITPKKVDVVAQ
VC0395_016  221 SVADRDTLKLTARESEVLFLLLYGKKPQHIAIARVMGISIKTVEGYEAKLRSKFGALSKDQLIDLALDRGFGSVIPKTLRLKQLSVVLSDHITPKKVDVVAQ
VCLMA_B082  221 SVADRDTLKLTARESEVLFLLLYGKKPQHIAIARVMGISIKTVEGYEAKLRSKFGALSKDQLIDLALDRGFGSVIPKTLRLKQLSVVLSDHITPKKVDVVAQ
vfu_B00971  221 SHSETPLPKLTRESEVLFLLLYGKKPQHIAIARVMGISIKTVEGYEARLRNKFAGHSKENLDDVALDLGFGSVIPKTLRLKQLSVVLSKNEHAA
N175_16845  221 GVLEPISGPLTRESEVLFLLLYGKKPKNIARVMKISIKTVEGYEAKLRHKFAAHSKEQLIDMALDQGYGSNIPKTLRLKQLSVVLSNSECPI
VAA_01919   221 GVLEPISGPLTRESEVLFLLLYGKKPKNIARVMKISIKTVEGYEAKLRHKFAAHSKEQLIDMALDQGYGSNIPKTLRLKQLSVVLSNSECPI
    
```

**B**

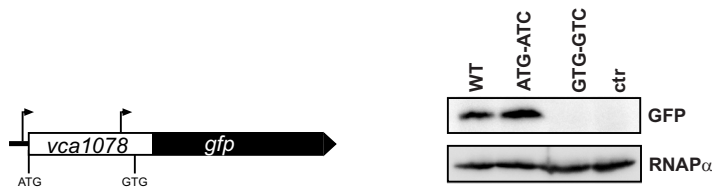

Figure S5

Papenfort *et al.*, 2015

A

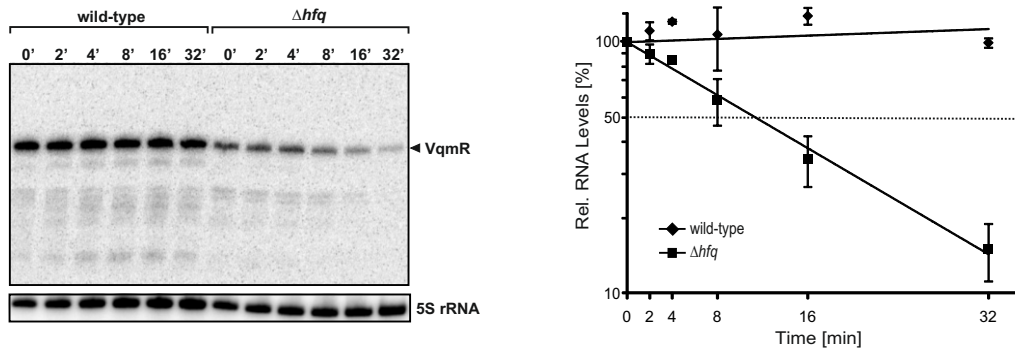

B

Sequence alignment of R1 and R2 regions across various species. The R1 region is highlighted in a box above the sequences, and the R2 region is highlighted in a box below the sequences.

```

Vch      CAGAGCATGAGTTGCATGACTCG--ATGCTTGGTATCAATATGATACCTCTGTGTG---TTCAGCAGACCCTCGGTC
Vfu      CAAGCGTTAGGT-CAGACCTA--CCGCCGATATCTTATTGATATCTCTGTGTG---TTCAGCAGACCCTCGGTC
Van      GAATATCAAACACGTTG--ATATTGATATCCATGTGGTATCCCTATGAA---TTTGCAACACCCTCGGDAG
Vpa      CGAGCTC-TAGGATGCATACGACCTGAGCTC-TCGGTATCTGATTGATACCTCTAACTTA-CTTAGCA-GACCCTCGGTA
Vha      CGAGCTC-TAGGATGCATACGACCTGAGCTCATCGGTATCTACTTGATACCTCTAACTTA-CTTAGCA-GACCCTCGGTA
Val      CGAGCTT-TAAGATGCATACGATCTAAAGCTC-TCGGTATCTCATGATACCTCTAACTTA-CTTAGCA-GACCCTCGGTA
Vvu      AGAGATCGTGACAAGCATACGTCTGCTGT-CTC-TCGGTATCTTGT-GATACCTCTAAATTGGCGTAGCAAGACCCTCGGTA
Vpr      TGACTCAGATGACAGTATCTGCGTT-----TGGTATCTA-TTGATACGTCA-----TTCTCAACCGGTAACGTTG

Vch      GATTCAT-GGAACCTCTTCTACAGTCGACAAGATATGTTTCTTGTATTTAT-GCCAGCCCGTCTCAGGCTGGCTTTTTT
Vfu      AAATCAT-GGAACCTCTTCTACAGTCGACAAGATATGTTTCTTGTATTTATGTTGCCAGCCCGTCTCAGGCTGGCTTTTTT
Van      CATTCAT-AGAACCTCTTCTACAGTCGACAAGAAGCAATTCTTGTATTTAT-GCCAGCCCGTCTCAGGCTGGCTTTTTT
Vpa      TGTAATTAGGAACCTCTTCTACAGTCGACAAGATT-ATATCTTGTGTT---GCCAGCCCGTCTCAGGCTGGCTTTTTT
Vha      CGTAATTTAGGAACCTCTTCTACAGTCGACAAGATT-ATATCTTGTGTT---GCCAGCCCGTCTCAGGCTGGCTTTTTT
Val      GGTAATTAGGAACCTCTTCTACAGTCGACAAGATT-ATATCTTGTGTT---GCCAGCCCGTCTCAGGCTGGCTTTTTT
Vvu      TGTGATTTAGGAACCTCTTCTACAGTCGACAAGATTGATATCTTGTGTT---GCCAGCCCGTCTCAGGCTGGCTTTTTT
Vpr      GG--CAT-GATCTCTTCTACAGTCGACAAGAT--AAATCTTGTGTT---GCCAGCCT---TTATGGCTGGCTTTTTT
    
```

C

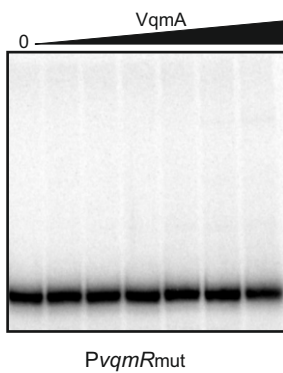

Figure S6

Papenfort *et al.*, 2015

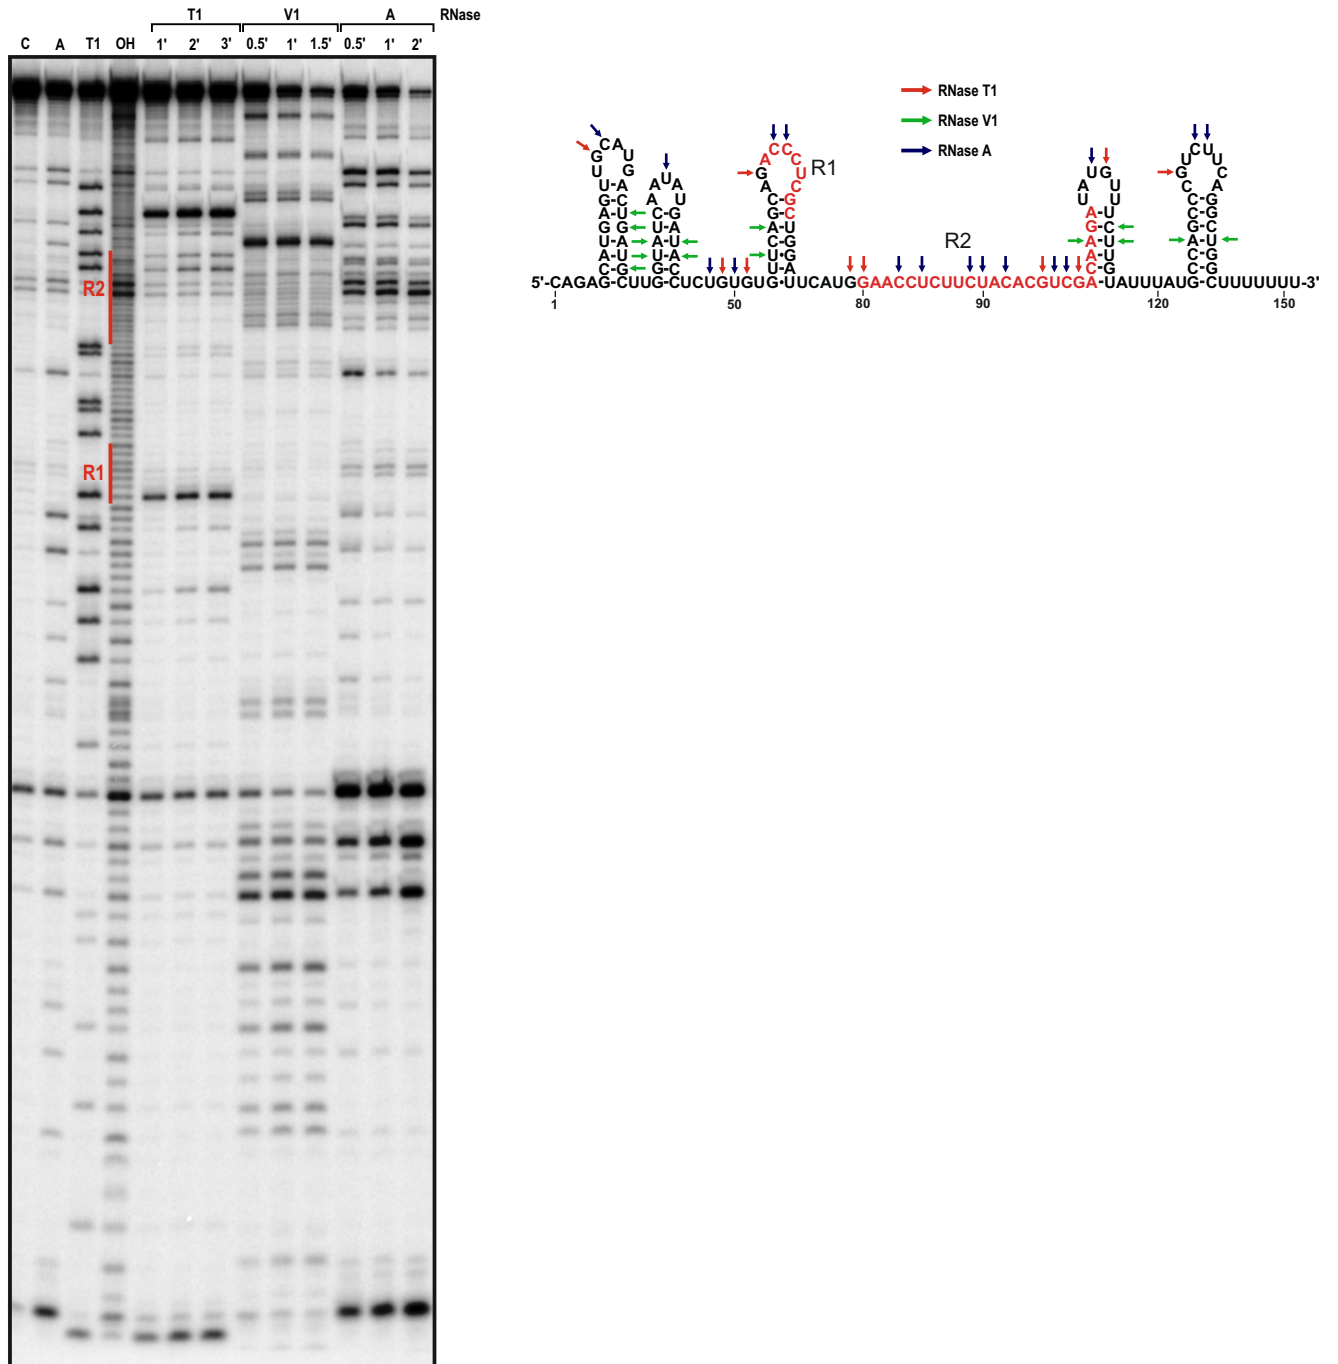

Figure S7

Papenfort *et al.*, 2015

**A**

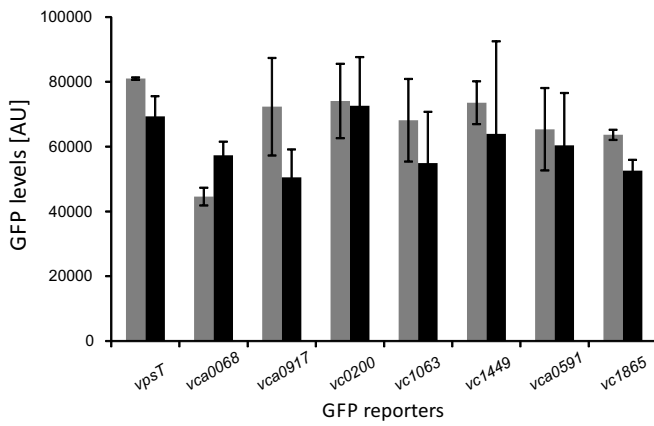

**B**

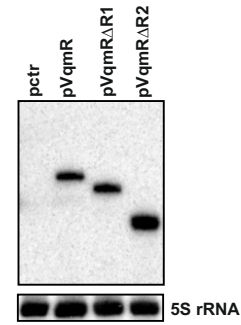

**C**

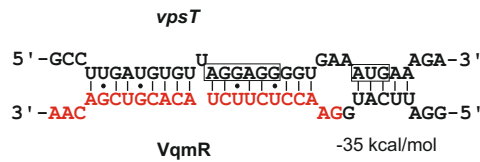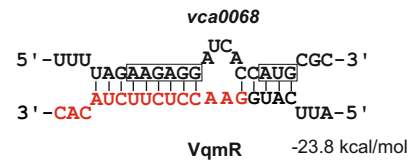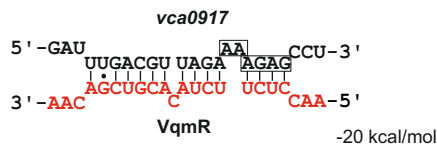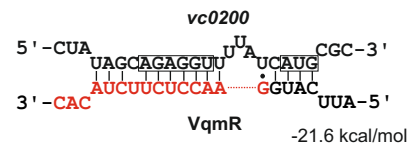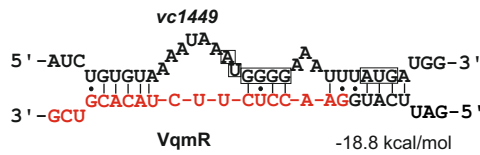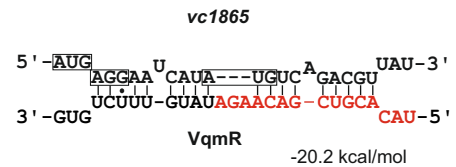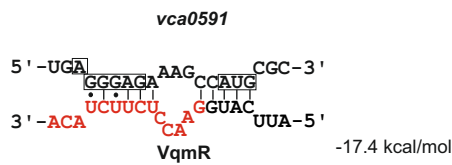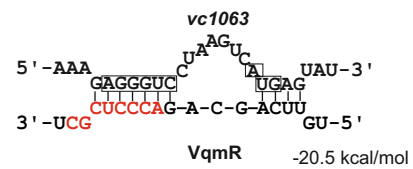

**Figure S8**

Papenfort *et al.*, 2015

**A**

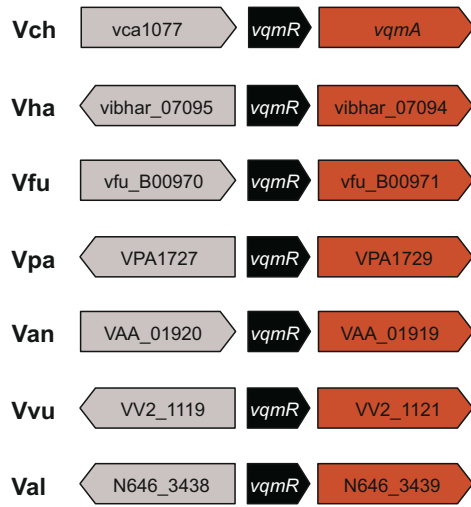

**B**

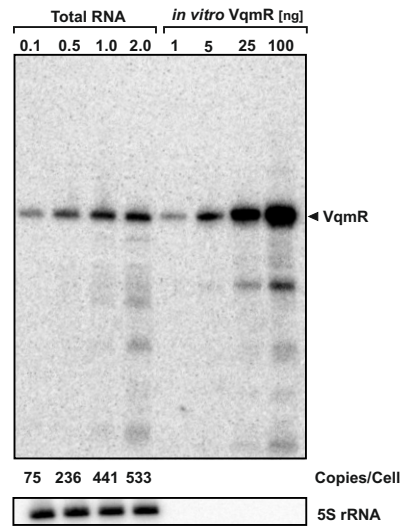

Supplement: pnas.1500203112.sapp.pdf [file pnas.1500203112.sapp.pdf]
